# Supplementary material
Source: MDPI journal article supplement (https://www.mdpi.com/1999-4907/11/5/589)
Supplement: s1 [file s1]

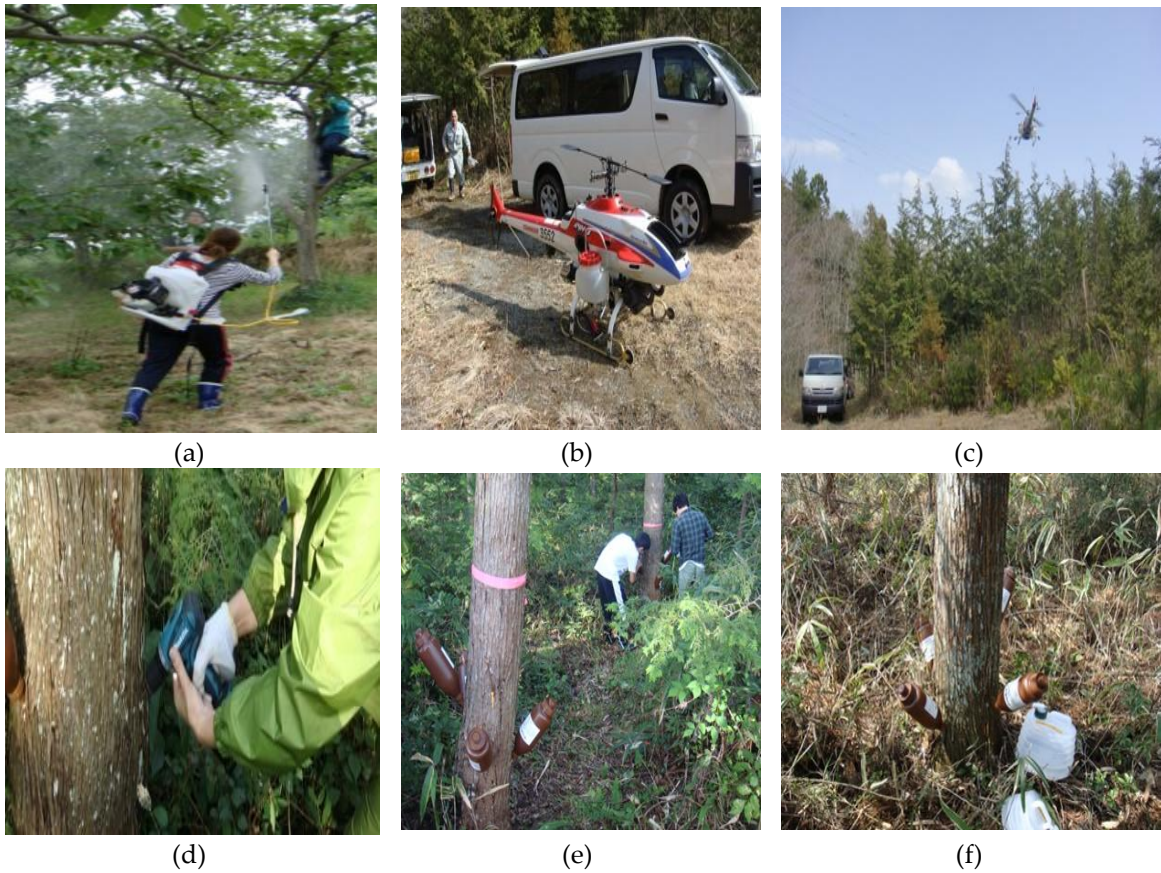

**Figure S1.** Attempted trials of potassium fertilization into forest trees by foliar spray either by hand (a) or radio-controlled helicopter (b and c) and by direct injection into tree trunks (d, e, and f) in a small forest. 0.5 to 2 M KCl solution was used for the fertilization.

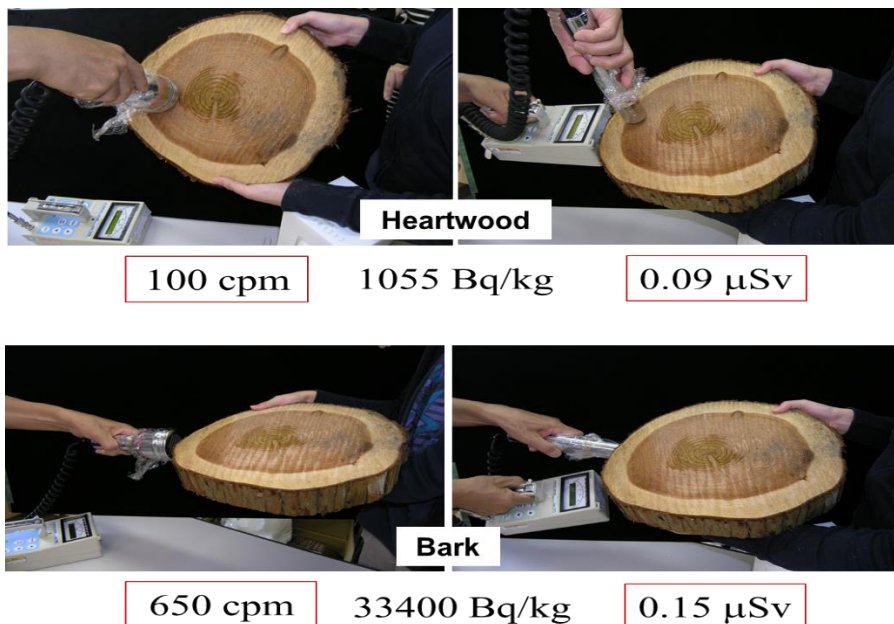

**Figure S2.** Levels of radioactivity (cpm) determined by anNaI (TI) scintillation counter (left) and those of radiation (μSv) using a Geiger counter (right), based on radiocesium content (Bq/kg) in the stem section.

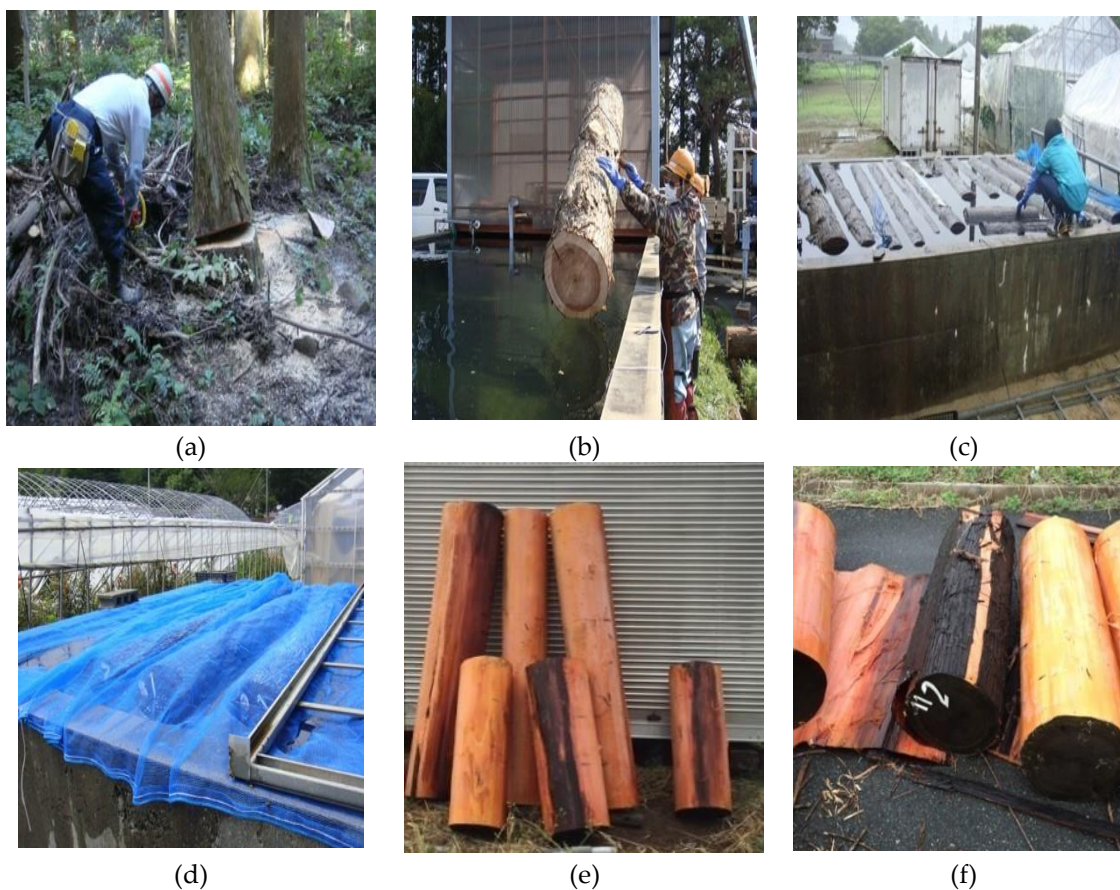

**Figure 3.** Ponding experiments for Fukushima forest trees. Cutting (a), immersion in the pool of water (b), stems in a pool (c), covered pool (d), vertical drain (e), and horizontal drain (f).

**Table S1.** Numbers of stems used for ponding experiments.

| Radiocesium content in xylem | Length |     |     | Treatment time |          |
|------------------------------|--------|-----|-----|----------------|----------|
|                              | 2 m    | 3 m | 4 m | 165 days       | 575 days |
|                              |        |     |     | number         |          |
| ~1200 Bq/kg                  | 10     |     |     | 7              | 3        |
|                              |        | 1   | 3   | 1              | 3        |
| ~2500 Bq/kg                  |        | 1   | 3   | 1              | 3        |
| ~4100 Bq/kg                  |        | 1   | 3   |                | 3        |

Three low-level (~1200 Bq/kg in wood), two medium-level (~2500 Bq/kg in wood), and two high-level radiocesium-contaminated trees (~4100 Bq/kg) were cut down for use in the ponding method (Figure S3).
